# Supplementary material for: Mitochondrial nucleoid remodeling and biogenesis are regulated by the p53-p21WAF1-PKCζ pathway in p16INK4a-silenced cells
Source: publisher site journal article supplement (doi:10.18632/aging.103029), 2020-04-24
Supplement: Supplementary file [file aging-v12i8-103029-supplementary-material-SD3.pdf]

## SUPPLEMENTARY TABLE

Supplementary Table 1. Real-time PCR primer list.

|                                      | Primer sequences                 |
|--------------------------------------|----------------------------------|
| COX17 F                              | 5'-CGAGGCTGGCATAGATTTGG-3'       |
| COX17 R                              | 5'-AACCAGACCCGGCATCTTTC-3'       |
| ATP5G1 F                             | 5'-GCTGAGACCAAGGGCTAAAG-3'       |
| ATP5G1 R                             | 5'-CGGATCAGAGCIGGAGAAATG-3'      |
| NDUFA7 F                             | 5'-CTGTGGGTCCTAGCCACAAG-3'       |
| NDUFA7 R                             | 5'-GCCTTCTGCGACGACATGAT-3'       |
| COX1 F                               | 5'-CTCCTACTCCTGCTCGCATC-3'       |
| COX1 R                               | 5'-GGGTGACCGAAAAATCAGAA-3'       |
| mtXD4 F                              | 5'-TAGCAGAGACCAACCGAACC-3'       |
| mtXD4 R                              | 5'-GGGGAATGCTGGAGATTGTA-3'       |
| ATPase 8 F                           | 5'-AATATTAACACAAACTACCACCTACC-3' |
| ATPase 8 R                           | 5'-TGGTTCTCAGGGTTTGTATA-3'       |
| PGC-1 $\alpha$ F                     | 5'-GGCAGAAGGCAATTGAAGAG-3'       |
| PGC-1 $\alpha$ R                     | 5'-TCAAACGGTCCCTCAGTTC-3'        |
| TFAM F                               | 5'-CCGAGGTGGTTTTTCATCTGT-3'      |
| IF AM R                              | 5GCATCTGGGTTCTGAGCTTT-3'         |
| NRF1 F                               | 5'-CCACGTTACAGGGAGGTGAG-3'       |
| NRF1 R                               | 5'-TGTAGCTCCCTGCTGCATCT-3'       |
| c-fos F                              | 5'-TGACTGATACTCCAAGCGGA-3        |
| c-fos R                              | 5'-CAGGTCATCAGGGATCTTGCA-3'      |
| c-myc F                              | 5'-GATICICTGCTCCTCGAC-35         |
| c-myc R                              | 5'-TCCAGACTCIGACCTUTGC-S'        |
| OPA1 F                               | 5'-TGTGATTGAAAACATCTACCTTCCA-3'  |
| OPA1 R                               | 5'-TTTAAGCTTGATATCCACTGTGGTGT-3' |
| btg2 F                               | 5'-GAAAAGCCGTCCAAGGGC-3'         |
| btg2 R                               | 5'-CTTGTGGTTGATGCGAATGC-3'       |
| pl6 F                                | 5'-TTCCTGGACACGCTGGT-3'          |
| pl6 R                                | 5'-CAATCGGGGATGTCTGAG-31         |
| p21 F                                | 5'-CGACTGTGATGCGCTAATGG-3'       |
| p21 R                                | 5'-CCGTTTTTCGACCCTGAGAG-S'       |
| 18SrRNA F                            | 5'-GGAGAGGGAGCCTGAGAAAC-3'       |
| 18SrRNA R                            | 5'-TCGGGAGTGGGTAATTTGC-3'        |
| NADH dehydrogenase subunit 1 (ND1) F | 5'-CCCTAAAACCCGCCACATCT-3'       |
| NADH dehydrogenase subunit 1 (ND1) R | 5'-GAGCGATGGTGAGAGCTAAGGT-3'     |
